# Supplementary material for: Characterization of pathogenesis of and immune response to Burkholderia pseudomallei K96243 using both inhalational and intraperitoneal infection models in BALB/c and C57BL/6 mice
Source: PLoS One. 2017 Feb 24;12(2):e0172627. doi: 10.1371/journal.pone.0172627 (PMC5325312; doi:10.1371/journal.pone.0172627)
Supplement: S6 Table — (XLSX) [file pone.0172627.s011.xlsx]

## Sheet: Sheet1
	Table S6. Cell distribution of spleens from aerosol infectedexposed BALB/c or C57BL/6 mice with B. pseudomallei K96243.
				% Cell Typea
				Days Post-infection
	Mouse Strain	Cell Type	Normal Naïve Miceb	0c,d	2	4	7	15	22	28	59
	A. BALB/c.
		CD4+ T Cells	23.51 ( 1.027 )	32.42 ( 1.017 ) §	29.09 ( 1.058 ) ¶	24.59 ( 1.077 )	23.98 ( 1.057 )	15.19 ( 1.151 )	19.76 ( 1.063 )	---	---
		CD8+ T Cells	9.96 ( 1.040 )	16.79 ( 1.016 ) §	16.45 ( 1.062 ) §	15.91 ( 1.083 ) §	11.63 ( 1.064 ) †	6.65 ( 1.147 )	8.00 ( 1.052 )	---	---
		BCells	50.73 ( 1.041 )	47.42 ( 1.014 )	46.51 ( 1.046 )	47.75 ( 1.081 )	47.02 ( 1.067 )	35.56 ( 1.088 )	51.11 ( 1.034 )	---	---
		Monocyte/Macrophages	4.38 ( 1.110 )	10.22 ( 1.043 ) §	8.37 ( 1.051 ) §	13.08 ( 1.099 ) §	12.00 ( 1.074 ) §	30.88 ( 1.222 ) §	20.61 ( 1.201 ) §	---	---
		NKCells	4.29 ( 1.118 )	6.87 ( 1.081 ) §	7.92 ( 1.082 ) §	11.15 ( 1.138 ) §	11.10 ( 1.056 ) §	29.58 ( 1.046 ) §	7.92 ( 1.114 ) §	---	---
		Granulocytes	0.89 ( 1.186 )	1.09 ( 1.089 )	3.94 ( 1.070 ) §	0.76 ( 1.079 )	5.02 ( 1.332 ) §	23.42 ( 1.261 ) §	14.45 ( 1.254 ) §	---	---
	B. C57BL/6.			0	2	4	7	15	22	28	59
		CD4+ T Cells	16.11 ( 1.041 )	26.30 ( 1.055 ) §	17.87 ( 1.081 )	17.67 ( 1.036 )	20.27 ( 1.073 ) ¶	19.68 ( 1.062 ) ¶	22.13 ( 1.046 ) §	21.87 ( 1.029 ) §	18.41 ( 1.050 ) †
		CD8+ T Cells	10.80 ( 1.034 )	14.43 ( 1.048 ) §	11.86 ( 1.036 )	11.06 ( 1.043 )	11.83 ( 1.071 )	10.43 ( 1.077 )	11.44 ( 1.063 )	11.27 ( 1.036 )	13.17 ( 1.027 ) §
		BCells	65.12 ( 1.008 )	55.86 ( 1.034 )	63.11 ( 1.030 )	59.75 ( 1.033 )	50.52 ( 1.026 )	47.27 ( 1.105 )	58.85 ( 1.013 )	64.17 ( 1.012 )	60.37 ( 1.010 )
		Monocyte/Macrophages	2.75 ( 1.126 )	8.76 ( 1.030 ) §	6.18 ( 1.172 ) §	9.06 ( 1.068 ) §	12.11 ( 1.192 ) §	14.32 ( 1.281 ) §	4.31 ( 1.161 ) †	5.99 ( 1.113 ) §	3.18 ( 1.157 )
		NKCells	2.30 ( 1.107 )	7.60 ( 1.072 ) §	6.20 ( 1.156 ) §	8.76 ( 1.072 ) §	12.50 ( 1.073 ) §	25.35 ( 1.064 ) §	5.24 ( 1.097 ) §	11.91 ( 1.052 ) §	7.63 ( 1.103 ) §
		Granulocytes	0.56 ( 1.181 )	0.72 ( 1.152 )	1.58 ( 1.165 ) §	0.32 ( 1.133 ) ¶	3.87 ( 1.458 ) §	8.41 ( 1.351 ) §	1.91 ( 1.186 ) §	1.39 ( 1.341 ) ¶	1.53 ( 1.162 ) §
		a % Cell type were reported as geometric means with the geometric standard error of the means (SEM).
		b N was 10 for normal naïve BALB/c mice, and N was 4 for normal naïve C57BL/6 mice.
		c N was equal to 5 for each mouse strain at each time point post-infection (PI).					Dash lines (---) represent no data because mice had expired.
		d For significant levels compared to the naïve, control mice: † P<0.05; ¶ P<0.01; § P£0.001.
