# Supplementary material for: Characterization of pathogenesis of and immune response to Burkholderia pseudomallei K96243 using both inhalational and intraperitoneal infection models in BALB/c and C57BL/6 mice
Source: PLoS One. 2017 Feb 24;12(2):e0172627. doi: 10.1371/journal.pone.0172627 (PMC5325312; doi:10.1371/journal.pone.0172627)
Supplement: S8 Table — (XLSX) [file pone.0172627.s013.xlsx]

## Sheet: Sheet1
	Table S8. Cytokines/chemokines in spleen extracts from BALB/c and C57BL/6 mice after aerosol challenge with B. pseudomallei K96243.
			Amount Cytokine/Chemokine Expressed (pg/ml)a	Amount Cytokine/Chemokine Expressed (pg/ml)a
				Days Post-infection
	Cytokine/ Chemokine	Mouse Strainb	Naïvec, Control	0d	2	4	7	15	22	28	59	91
	IFN-γ	BALB/c	20.2(1.09)	10.4(1.14)	207.1(1.62)¶	25.6(1.40)	177(1.78)†	266.1(1.38)¶	280.4(1.34)§	---	---	---
		C57BL/6	15.2(1.04)	10.7(1.10)	98.5(1.62)†	14.4(1.12)	19.6(1.43)	154.2(1.32)§	154.3(1.19)§	163.1(1.07)§	15.1(1.02)	17.4(1.09)
	TNF-α	BALB/c	12.6(1.17)	20.1(1.03)†	25.1(1.10)¶	20.5(1.03)†	28.1(1.07)§	125.9(1.96)†	63.3(1.55)†	---	---	---
		C57BL/6	23.3(23.3)	19.9(1.03)	25.5(1.06)	26.3(1.12)	20.8(1.05)	46.5(1.24)†	23.1(1.06)	15.2(1.36)	24.9(1.03)	23.3(1.05)
	IL-1α	BALB/c	75.8(1.10)	170(1.11)§	651.9(1.32)¶	304.9(1.22)¶	1643(1.45)§	1963(3.28)	750.8(1.88)†	---	---	---
		C57BL/6	45.9(1.19)	139.2(1.11)¶	339.6(1.19)§	303.2(1.32)¶	225.4(1.06)¶	271.1(1.42)¶	24.4(1.06)	90.4(1.51)	252.4(1.08)§	230.4(1.45)¶
	IL-1β	BALB/c	38.9(1.23)	97.6(1.10)¶	303.2(1.35)§	207.2(1.30)§	798.9(1.26)§	1296(1.45)§	982.3(1.45)§	---	---	---
		C57BL/6	21.1(1.10)	51.1(1.11)§	138.6(1.27)§	190.1(1.62)¶	180.6(1.22)§	241.5(1.85)†	182.7(1.26)§	220.9(1.14)§	164(1.10)§	197.4(1.40)¶
	IL-2	BALB/c	7.30(1.15)	8.90(1.02)	11.4(1.07)†	9.90(1.06)	12.1(1.06)¶	71(1.05)§	67.1(1.05)§	---	---	---
		C57BL/6	3.30(1.08)	9.20(1.02)§	11.2(1.05)§	10.1(1.08)§	9.91.03)§	73.5(1.07)§	58.3(1.03)§	59.2(1.03)§	14.4(1.08)§	14.4(1.06)§
	IL-4	BALB/c	24.7(1.10)	10.5(1.29)	23.2(1.16)	10.3(1.43)	27.6(1.41)	412.0(1.43)¶	458.2(1.11)§	---	---	---
		C57BL/6	20.1(1.04)	32.0(1.10)†	28.2(1.26)	9.70(1.39)	17.6(1.26)	673.5(1.11)§	497.6(1.09)§	522.2(1.07)§	21.8(1.14)¶	24.1(1.45)
	IL-6	BALB/c	22.4(1.10)	33.0(1.02)¶	45.7(1.11)§	32.5(1.01)¶	63.5(1.19)¶	114.5(2.09)	101.6(1.43)†	---	---	---
		C57BL/6	29.5(1.01)	31.7(1.04)	38.6(1.08)†	36.4(1.16)	32.6(1.03)†	61.5(1.35)	60.2(1.26)†	23.8(1.44)	31.3(1.28)	24.8(1.21)
	IL-10	BALB/c	26.2(1.07)	75.1(1.35)†	116.7(1.22)§	86.7(1.21)¶	145.0(1.11)§	268.2(1.26)¶	126.2(1.23)§	---	---	---
		C57BL/6	35.6(1.14)	85.3(1.21)¶	109.4(1.23)¶	117.7(1.17)§	134.7(1.19)§	234.2(1.27)§	83.6(1.26)†	116.4(1.30)¶	122.4(1.06)§	99.2(1.07)¶
	IL-12	BALB/c	19.1(1.23)	25.2(1.23)	23.7(1.29)	26.9(1.45)	14.3(1.99)	283.0(1.26)§	359.0(1.08)§	---	---	---
		C57BL/6	28.5(1.19)	29.1(1.21	54.0(1.20)†	56.2(1.45)	42.8(1.36)	290.1(1.24)§	166.0(1.20)§	242.4(1.09)§	77.8(1.10)¶	51.4(1.15)†
	FGFb	BALB/c	489.4(1.21)	3456(1.06)§	1613(1.12)§	1964(1.34)¶	2363(1.28)§	1719(1.17)§	1254(1.25)†	---	---	---
		C57BL/6	313.8(1.02)	2431(1.17)§	2152(1.06)§	3841(1.22)§	3086(1.19)§	739(1.39)	272.0(1.10)	503.8(1.28)	2967(1.06)§	1629(1.15)§
	IP10	BALB/c	19.5(1.05)	41.4(1.07)§	281.1(1.43)¶	86.3(1.10)§	177.0(1.24)§	67.9(2.12)	45.8(1.77)	---	---	---
		C57BL/6	24.8(1.33)	62.5(1.13)†	377.2(1.39)§	154.5(1.26)¶	120.1(1.23)¶	20.8(1.06)	18.4(1.03)	19.4(1.04)	45.6(1.06)	34.2(1.16)
	KC	BALB/c	350.8(1.04)	243.8(1.11)	372.3(1.10)	303.3(1.05)	573.6(1.25)	1629(1.46)†	970.6(1.45)	---	---	---
		C57BL/6	206.5(1.07)	243.1(1.04)	260.5(1.09)	357.6(1.13)¶	351.4(1.14)†	707.6(1.12)§	174.5(1.32)	256.9(1.30)	230.0(1.17)	277.1(1.18)
	MCP-1	BALB/c	18.2(1.12)	14.7(1.04)	25.9(1.18)	16.31.02)	30.8(1.20)†	76.4(1.47)†	51.5(1.63)	---	---	---
		C57BL/6	13.3(1.08)	15.0(1.04)	23.6(1.15)†	22.9(1.18)†	23.1(1.14)¶	28.5(1.08)§	21.5(1.04)¶	20.2(1.02)¶	8.0(1.10)	11.6(1.34)
	MIG	BALB/c	142.1(1.09)	871.1(1.17)§	3494(1.36)§	1813(1.19)§	4313(1.16)§	3197(1.25)§	1905(1.50)¶	---	---	---
		C57BL/6	216(1.41)	865.5(1.16)†	3799(1.21)§	1401(1.43)¶	1900(1.26)¶	1189(1.19)¶	299.9(1.31)	421.2(1.30)	1173(1.0)†	789.6(1.24)†
	MIP-1α	BALB/c	59.3(1.12)	46.9(1.05)	89.4(1.17)	80.6(1.23)	160.2(1.41)†	688.2(2.46)	288.7(1.46)†	---	---	---
		C57BL/6	26.4(1.23)	43.6(1.05)	68.5(1.10)†	75.6(1.24)†	53.7(1.06)†	161.0(1.14)§	88.2(1.10)¶	108.0(1.10)¶	86.4(1.18)¶	89.1(1.11)¶
	VEGF	BALB/c	13.5(1.05)	12.4(1.09)	47.8(1.18)§	37.5(1.25)¶	33.4(1.23)†	293.4(1.98)†	111.4(1.52)¶	---	---	---
		C57BL/6	4.6(1.07)	7.60(1.13)†	32.1(1.21)§	24.4(1.30)¶	50.7(1.45)¶	66.2(1.60)¶	2.70(1.64)	9.70(1.49)	12.7(1.38)†	35.3(2.22)
	a Cytokine/chemokines were reported as geometric means with the geometric standard error of the means.
	b N was equal to 5 for each mouse strain at each time point post-infection (PI). Dashes (---) represent no data because no mice were left at that time.
	c For geometric means for the naïve mice, n was equal to 10 for BALB/c mice, and n was equal to 4 for C57BL/6 mice.
	d For significant levels compared to the naïve, control mice: †P<0.05; ¶P<0.01; §P£0.001.
